# Supplementary material for: Global sensitivity analysis and adaptive stochastic sampling of a subsurface-flow model using active subspaces
Source: Copernicus journal article supplement (doi:10.5194/hess-23-3787-2019), 2019-09-18
Supplement: Supplementary file 1 [file hess-23-3787-2019-supplement.zip]

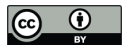

## *Supplement of*

# **Global sensitivity analysis and adaptive stochastic sampling of a subsurface-flow model using active subspaces**

**Daniel Erdal and Olaf A. Cirpka**

*Correspondence to:* Daniel Erdal ([daniel.erdal@uni-tuebingen.de](mailto:daniel.erdal@uni-tuebingen.de))

- [hess-23-3787-2019-supplement-title-page.pdf](#)
- [Active Subspace Pilot.mlappinstall](#)

The copyright of individual parts of the supplement might differ from the CC BY 4.0 License.
